# Supplementary material
Source: publisher figshare collection journal article supplement (https://acs.figshare.com/ndownloader/files/4849249)
Supplement: Supplementary file 1 [file 4849249]

## Supporting Information

# Enzymatic Degradation of Polysaccharide-Based Layer-by-Layer Structures

Matias J. Cardoso<sup>†,‡</sup>, Sofia G. Caridade<sup>†,‡</sup>, Rui R. Costa<sup>†,‡</sup>, João F. Mano<sup>†,‡,\*</sup>

<sup>†</sup>3B's Research Group – Biomaterials, Biodegradables and Biomimetics, University of Minho, Headquarters of the European Institute of Excellence of Tissue Engineering and Regenerative Medicine, Avepark – Parque de Ciência e Tecnologia, Zona Industrial da Gandra, 4805-017 Barco GMR, Portugal.

<sup>‡</sup>ICVS/3B's, PT Government Associated Laboratory, Braga/Guimarães, Portugal.

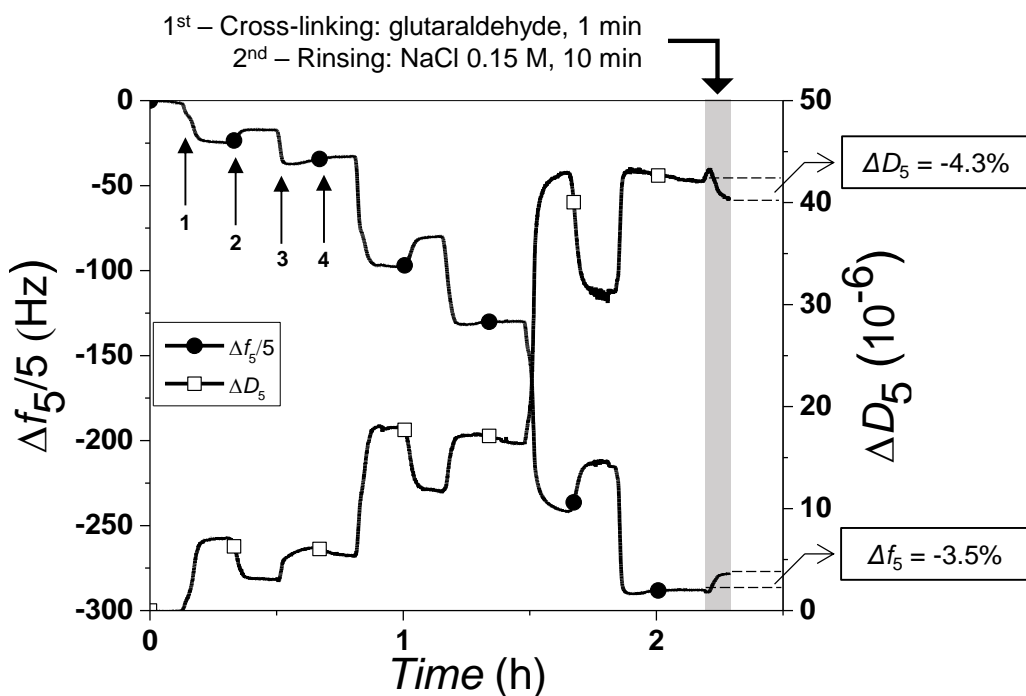

**Figure S1.** Representative QCM-D results of *in situ* buildup of (CHT/HA)<sub>3</sub> thin films, followed by 1% (w/v) glutaraldehyde injection during 1 min for cross-linking and a rinsing step afterwards during 10 minutes to stop the reaction. The 5<sup>th</sup> overtone with normalized variations of frequency ( $\Delta f_5/5$ , ●), and dissipation ( $\Delta D_5$ , □) are represented. (1) Addition of CHT; (2) and (4) rinsing steps with NaCl 0.15 M; (3) addition of HA. The cross-linking step caused variations of  $\Delta f_5/5$  and  $\Delta D_5$ , of -3.5% and -4.3%, respectively. The negative variations of these parameters indicate release of water caused by the cross-linking.

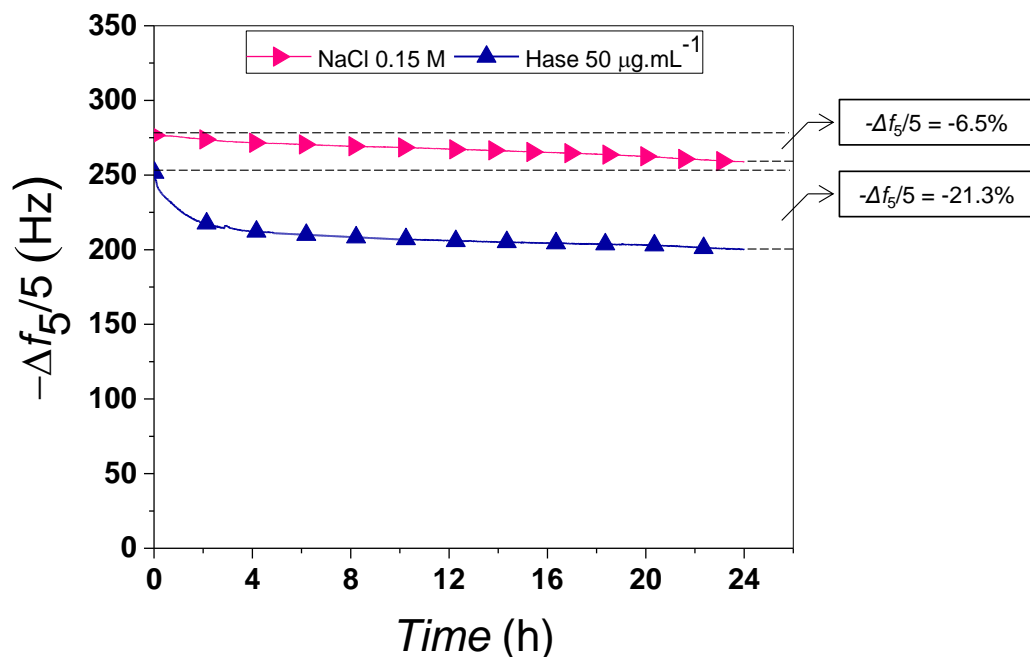

**Figure S2.** Normalized frequency variations for the 5<sup>th</sup> overtone ( $-\Delta f_5/5$ ) during 24h for cross-linked (CHT-HA)<sub>3</sub> thin films after adding NaCl 0.15 M (►) and Hase at 50  $\mu\text{g}\cdot\text{mL}^{-1}$  (▲).

After treating the data with the Voigt-based viscoelastic model, the observed signal variations for NaCl- and Hase-incubated samples accounted for **thickness reductions of 2% and 23%, respectively.**
